# Supplementary material for: <em>Drynaria fortunei</em>-Derived Polysaccharides Attenuated RANKL-Induced Osteoclast Differentiation by Modulating NFATc1
Source: Preprints.org preprint supplement (doi:10.20944/preprints202310.1322.v1), 2023-10-20
Supplement: Supplementary file 1 [file supplementary]

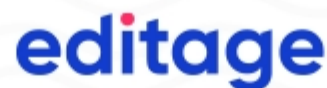

# Editing Certificate

This document certifies that the manuscript listed below has been edited to ensure language and grammar accuracy and is error free in these aspects. The logical presentation of ideas and the structure of the paper were also checked during the editing process. The edit was performed by professional editors at Editage, a brand of Cactus Communications. The author's core research ideas were not altered in any way during the editing process. The quality of the edit has been guaranteed, with the assumption that our suggested changes have been accepted and the text has not been further altered without the knowledge of our editors.

## MANUSCRIPT TITLE

**Drynaria fortunei-derived polysaccharides attenuate RANKL-induced osteoclast differentiation by modulating NFATc1**

## AUTHORS

**Jin Ryuk, Ami Lee, Taesoo Kim, Youn-Hwan Hwang, Hyunil Ha**

## ISSUED ON

**September 09, 2023**

## JOB CODE

**J1YUK\_20\_12**

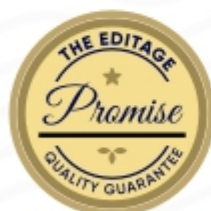

**Prabh Grewal**  
Vice President, Operations - Editage

**editage** | helping you  
get published

Since 2002, Editage has helped over 430,000 authors publish around 1.2 million research papers in scholarly journals across over 1000 disciplines through editorial, translation, transcription, and publication support services. Editage is a brand of Cactus Communications ([cactusglobal.com](https://cactusglobal.com)), a science communication and technology company.

**GLOBAL :**  
+1(833) 979-0061 | [request@editage.com](mailto:request@editage.com)

**KOREA :**  
02-3478-4396 | [submit-korea@editage.com](mailto:submit-korea@editage.com)

**CACTUS**
